# Supplementary material for: Protein Kinase C Is Involved in Vegetative Development, Stress Response and Pathogenicity in Verticillium dahliae
Source: MDPI journal article supplement (doi:10.3390/ijms241814266), 2023-09-19
Supplement: s1 [file s1]

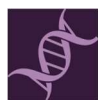

Article

# Protein Kinase C Is Involved in Vegetative Development, Stress Response and Pathogenicity in *Verticillium dahliae*

Dahui Wang, Zhibo Zhao, Youhua Long and Rong Fan \*

College of Agriculture, Guizhou University, Guiyang 550025, China; gzwadh07@126.com (D.W.);  
zjbzhao@gzu.edu.cn (Z.Z.); yhleng3@gzu.edu.cn (Y.L.)

\* Correspondence: rfan@gzu.edu.cn

**Table S1. Sequences and purpose of the primers used in this study**

| Primer name          | Primer sequence (5'-3')                             | Purpose                                                                     |
|----------------------|-----------------------------------------------------|-----------------------------------------------------------------------------|
| <i>VdPKC</i> -F      | GATGCGAAGGAAGAGGATT                                 | Amplification of <i>VdPKC</i> gene                                          |
| <i>VdPKC</i> -R      | ATTGCTTGCGACAGAACT                                  |                                                                             |
| <i>VdPKC</i> -q-F    | AGGAGATGCGAAGGAAGA                                  | Detection of <i>VdPKC</i> expression level                                  |
| <i>VdPKC</i> -q-R    | CCAAGAGACAGGCGAATT                                  |                                                                             |
| $\beta$ -tubulin-F   | TTTCCAGATCACCCACTCC                                 | Detection of expression of reference gene                                   |
| $\beta$ -tubulin-R   | ACGACCGAGAAGGTAGCC                                  |                                                                             |
| <i>VdPKC</i> -up-F   | ccaagctcaagcttaagcttCTCTGACGCCATCACAGAGT            | Amplification of upstream homologous fragment of <i>VdPKC</i> gene          |
| <i>VdPKC</i> -up-R   | atgccgaccgggaaccagttAGCTGTGCGAGACAGGTCGAT           |                                                                             |
| <i>VdPKC</i> -down-F | aatatcagttgggtgcaggGAGCCAGGACATGATAGATGACT          | Amplification of downstream homologous fragment of <i>VdPKC</i> gene        |
| <i>VdPKC</i> -down-R | attaacgccgaattgaattcTCCGTACCTTGTATAAAATGTTGTAA<br>G |                                                                             |
| <i>Hyg</i> -F        | AACTGGTTCCCGGTCGGCATCTACTC                          | Amplification of <i>Hyg</i> gene                                            |
| <i>Hyg</i> -R        | CCTGCAGCCCAACTGATATTGAAGGAGC                        |                                                                             |
| up- <i>Hyg</i> -F    | CTCTGACGCCATCACAGAGT                                | Knockout transformer validation                                             |
| up- <i>Hyg</i> -R    | AAATTTTGTGCTCACCGCCTGGAC                            |                                                                             |
| <i>Hyg</i> -down-F   | TCTCCTTGCATGCACCATTCCTTG                            |                                                                             |
| <i>Hyg</i> -down-R   | TCCGTACCTTGTATAAAATGTTGTAAAG                        |                                                                             |
| <i>VdPKC</i> -tg-F   | GATGCGAAGGAAGAGGATT                                 | Detection of <i>VdPKC</i> target gene fragments                             |
| <i>VdPKC</i> -tg-R   | ATTGCTTGCGACAGAACT                                  |                                                                             |
| <i>Hyg</i> -tg-F     | CCTGAACTCACCGCGACGTC                                | Detection of <i>Hyg</i> target gene fragments                               |
| <i>Hyg</i> -tg-R     | CTATTCCTTTGCCCTCGGACGAGTG                           |                                                                             |
| <i>VdPKC</i> -hb-F   | eggccagtccaagcttCCGGATTAATGCCAACTGCG                | Amplification of <i>VdPKC</i> and upstream homologous segments              |
| <i>VdPKC</i> -hb-R   | gcagcttctgcgaattcTTCAAAGTCGGCCGTGTAG                |                                                                             |
| <i>VdPKC</i> -cx-F   | ACGTGAGAAGCCGACTGC                                  | Amplification of <i>VdPKC</i> target gene segments by complementing mutants |
| <i>VdPKC</i> -cx-R   | TGAACTTGTGGCCGTTTACG                                |                                                                             |
| <i>actin</i> -F      | GCTTCCCGATGGTCAAGTCA                                | Detection of expression of reference gene                                   |
| <i>actin</i> -R      | GGATTCCAGCTGCTTCCATTC                               |                                                                             |
| <i>Vd</i> -F         | CCGCCGGTCCATCAGTCTCTCTGTTTATAC                      |                                                                             |

|              |                                |                                                  |
|--------------|--------------------------------|--------------------------------------------------|
| <i>Vd</i> -R | CGCCTGCGGGACTCCGATGCGAGCTGTAAC | Detection of <i>Verticillium dahliae</i> biomass |
| q-VdPks1-F   | CTCGTCCTGATCCGTATCCCA          | Detection of <i>VDAG_00190</i> expression level  |
| q-VdPks1-R   | TGTGAATTGAGGCAGGCATG           |                                                  |
| q-VdBrn1-F   | TGGCATCAAGACAGACATGTA          | Detection of <i>VDAG_03665</i> expression level  |
| q-VdBrn1-R   | ACAACGCGAGCGATGTTCGAT          |                                                  |
| q-VdScd1-F   | AAAGGTGTTTGAGAGCGGAC           | Detection of <i>VDAG_03393</i> expression level  |
| q-VdScd1-R   | ATCTCCCTCTCCACAACAGC           |                                                  |
| q-VdBrn2-F   | TATGTCCCTGGCGGCTTTAA           | Detection of <i>VDAG_00183</i> expression level  |
| q-VdBrn2-R   | TGATCCACTCGCAGTCTTCA           |                                                  |
| q-VdCmr1-F   | AGTTCAGAGGAAGCCGTCTT           | Detection of <i>VDAG_00195</i> expression level  |
| q-VdCmr1-R   | CAGCGTCGTGACAGTATTCG           |                                                  |
| VDH1-F       | GTCTATTCATCTGGTTCCTCCCTA       | Detection of <i>VDH1</i> expression level        |
| VDH1-R       | CAAACCTCTTACAATGTTGACGC        |                                                  |

Note: lowercase letters are primer sequences of splices
