# Supplementary material for: Protein Kinase C Is Involved in Vegetative Development, Stress Response and Pathogenicity in Verticillium dahliae
Source: MDPI journal article supplement (doi:10.3390/ijms241814266), 2023-09-19
Supplement: s1 [file s1]

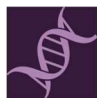

Article

# Protein Kinase C Is Involved in Vegetative Development, Stress Response and Pathogenicity in *Verticillium dahliae*

Dahui Wang, Zhibo Zhao, Youhua Long and Rong Fan \*

College of Agriculture, Guizhou University, Guiyang 550025, China; gzwadh07@126.com (D.W.);  
zbzhao@gzu.edu.cn (Z.Z.); yhlong3@gzu.edu.cn (Y.L.)

\* Correspondence: rfan@gzu.edu.cn

**Table S2.** Molecular docking results of VdPKC protein with fungicide molecule

| Fungicides | binding energy (kcal/mol) | Critical amino acid                           |
|------------|---------------------------|-----------------------------------------------|
| Polyoxin   | -5.6                      | TYR772、GLN735、GLN731、GLU357、ARG353、<br>LYS413 |
