# Supplementary material for: Protein Kinase C Is Involved in Vegetative Development, Stress Response and Pathogenicity in Verticillium dahliae
Source: MDPI journal article supplement (doi:10.3390/ijms241814266), 2023-09-19
Supplement: s1 [file s1]

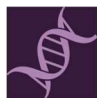

Article

# Protein Kinase C Is Involved in Vegetative Development, Stress Response and Pathogenicity in *Verticillium dahliae*

Dahui Wang, Zhibo Zhao, Youhua Long and Rong Fan \*

College of Agriculture, Guizhou University, Guiyang 550025, China; gzwdh07@126.com (D.W.);  
zbxhao@gzu.edu.cn (Z.Z.); yhleng3@gzu.edu.cn (Y.L.)

\* Correspondence: rfan@gzu.edu.cn

## Supplementary Figure S5. VdPKC protein model constructed by ROBETTA

The 3D model of the VdPKC protein was generated by modeling the ROBETTA integrated method (Supplementary Figure 5).

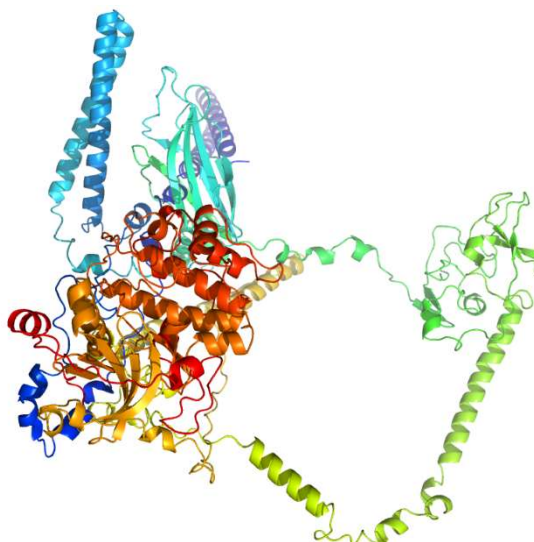

**Figure S5.** VdPKC protein model constructed by ROBETTA
