# Supplementary material for: Protein Kinase C Is Involved in Vegetative Development, Stress Response and Pathogenicity in Verticillium dahliae
Source: MDPI journal article supplement (doi:10.3390/ijms241814266), 2023-09-19
Supplement: s1 [file s1]

## Article

# Protein Kinase C Is Involved in Vegetative Development, Stress Response and Pathogenicity in *Verticillium dahliae*

Dahui Wang, Zhibo Zhao, Youhua Long and Rong Fan \*

College of Agriculture, Guizhou University, Guiyang 550025, China; gzwadh07@126.com (D.W.);  
zjbzhao@gzu.edu.cn (Z.Z.); yhleng3@gzu.edu.cn (Y.L.)

\* Correspondence: rfan@gzu.edu.cn

## Supplementary Figure S2. Knockout of the *VdPKC* gene affected conidial germination of *Verticillium dahliae*

Continued cultivation of WT,  $\Delta VdPKC$  and  $\Delta VdPKC$ -C conidia until 48 h microscopic observation of the germination revealed that WT and  $\Delta VdPKC$ -C had fully germinated, whereas  $\Delta VdPKC$  conidia still had only a small portion (Supplementary Figure 2). Showed that deletion of *vdpc* gene affected the germination of conidia of *V. dahliae*.

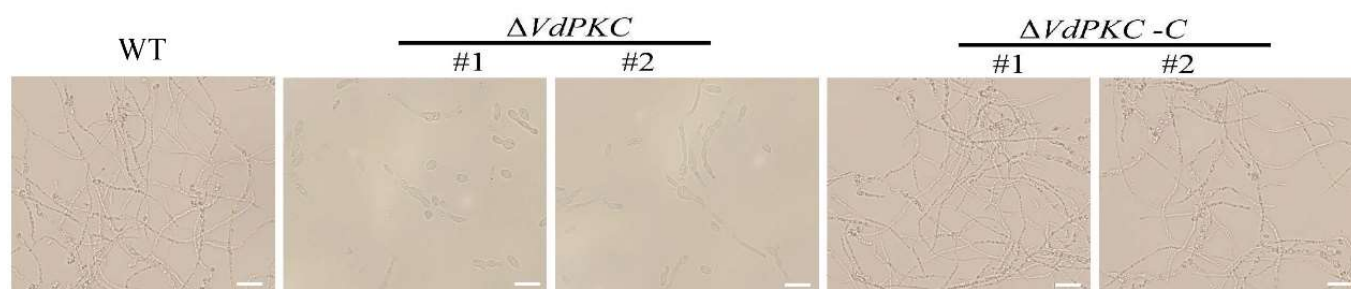

**Figure S2.** Knockout of the *VdPKC* gene affected conidial germination of *Verticillium dahliae*. The conidia of WT,  $\Delta VdPKC$  and  $\Delta VdPKC$ -C were germinated for 48 h, Bar=50  $\mu$ m.
