# Supplementary material for: Protein Kinase C Is Involved in Vegetative Development, Stress Response and Pathogenicity in Verticillium dahliae
Source: MDPI journal article supplement (doi:10.3390/ijms241814266), 2023-09-19
Supplement: s1 [file s1]

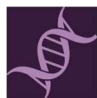

Article

# Protein Kinase C Is Involved in Vegetative Development, Stress Response and Pathogenicity in *Verticillium dahliae*

Dahui Wang, Zhibo Zhao, Youhua Long and Rong Fan \*

College of Agriculture, Guizhou University, Guiyang 550025, China; gzwadh07@126.com (D.W.);  
zbzhao@gzu.edu.cn (Z.Z.); yhlong3@gzu.edu.cn (Y.L.)

\* Correspondence: rfan@gzu.edu.cn

## Supplementary Figure S3. Expression levels of *VdPKC* during microsclerotium formation in *Verticillium dahliae*

To determine whether *VdPKC* gene are involved in regulating the formation of microsclerotia in *V. dahliae*. The *V. dahliae* conidia were collected, spread in BMM medium containing a sterile cellulose membrane, incubated at 20°C in the dark, and sampled at 72, 96, and 168 h, respectively, with 72 h as a control, and *V. dahliae*  $\beta$ -tubulin was used as an reference gene to examine *VdPKC* expression during and microsclerotia formation. The results of qRT-PCR showed that *VdPKC* gene was up-regulated during microsclerotia formation (Supplementary Figure 3). Showed that the *VdPKC* gene is involved in the synthesis of microsclerotia in *V. dahliae*.

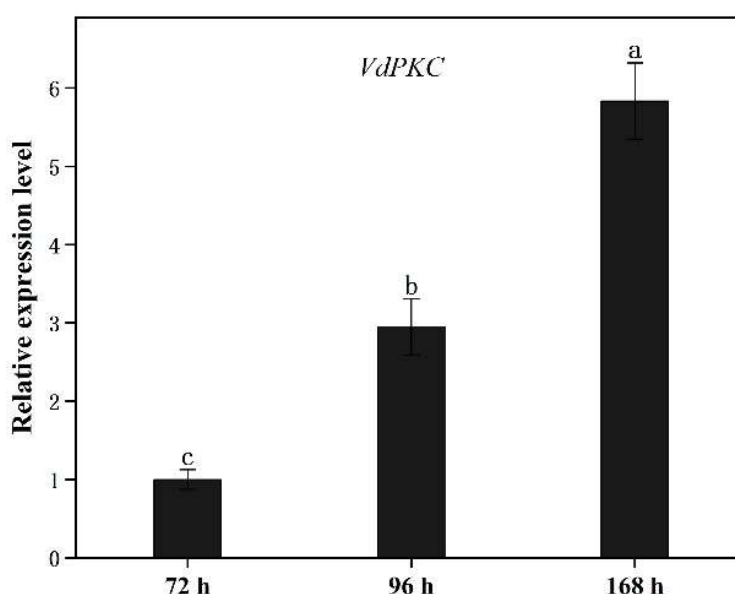

**Figure S3.** Expression levels of *VdPKC* during microsclerotium formation in *Verticillium dahliae*. Means were calculated from 3 independent replicates, error lines represent standard deviations, and different letters (a and b) indicate significant differences ( $P < 0.05$ ).
