# Supplementary material for: Protein Kinase C Is Involved in Vegetative Development, Stress Response and Pathogenicity in Verticillium dahliae
Source: MDPI journal article supplement (doi:10.3390/ijms241814266), 2023-09-19
Supplement: s1 [file s1]

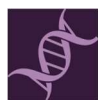

Article

# Protein Kinase C Is Involved in Vegetative Development, Stress Response and Pathogenicity in *Verticillium dahliae*

Dahui Wang, Zhibo Zhao, Youhua Long and Rong Fan \*

College of Agriculture, Guizhou University, Guiyang 550025, China; gzwadh07@126.com (D.W.);  
zbbzhao@gzu.edu.cn (Z.Z.); yhleng3@gzu.edu.cn (Y.L.)

\* Correspondence: rfan@gzu.edu.cn

## Supplementary Figure S6. Two-dimensional binding patterns of VdPKC protein with dimethomorph, fluormorph and polyoxin

An autodock-vina docking score value of less than -7.0 indicates that the target has strong binding ability with the compound, a score of less than -5.0 greater than -7.0 indicates that the compound small molecule has better binding ability with the target, and a score of between -5.0 and -4.25 indicates that the compound has some binding ability with the macromolecular target. Docking results showed that VdPKC protein could bind well to polyoxin small molecules to form a pocket complex (Supplementary Figure 6). The free binding energies is -5.6 kJ/mol (Supplementary Table 2). It shows that VdPKC protein has good binding ability with fungicide molecule polyoxin.

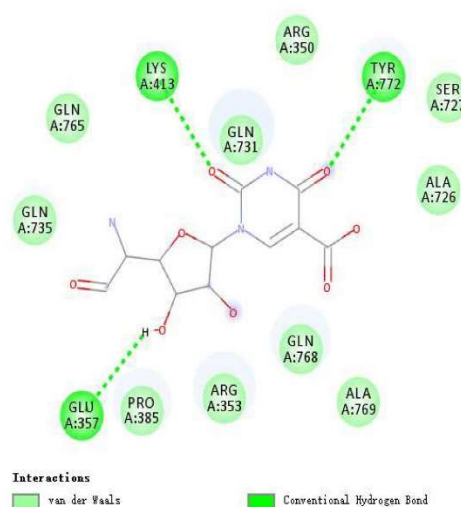

Figure S6. Two-dimensional binding patterns of VdPKC protein with dimethomorph, fluormorph and polyoxin
